# Supplementary material for: One-pot hydrothermal synthesis of lanthanide ions doped one-dimensional upconversion submicrocrystals and their potential application in vivo CT imaging
Source: Royal Society of Chemistry journal article supplement (doi:10.1039/c2nr32850j), 2012-11-02
Supplement: c2nr32850j.pdf [file c2nr32850j.pdf]

## Supporting Information

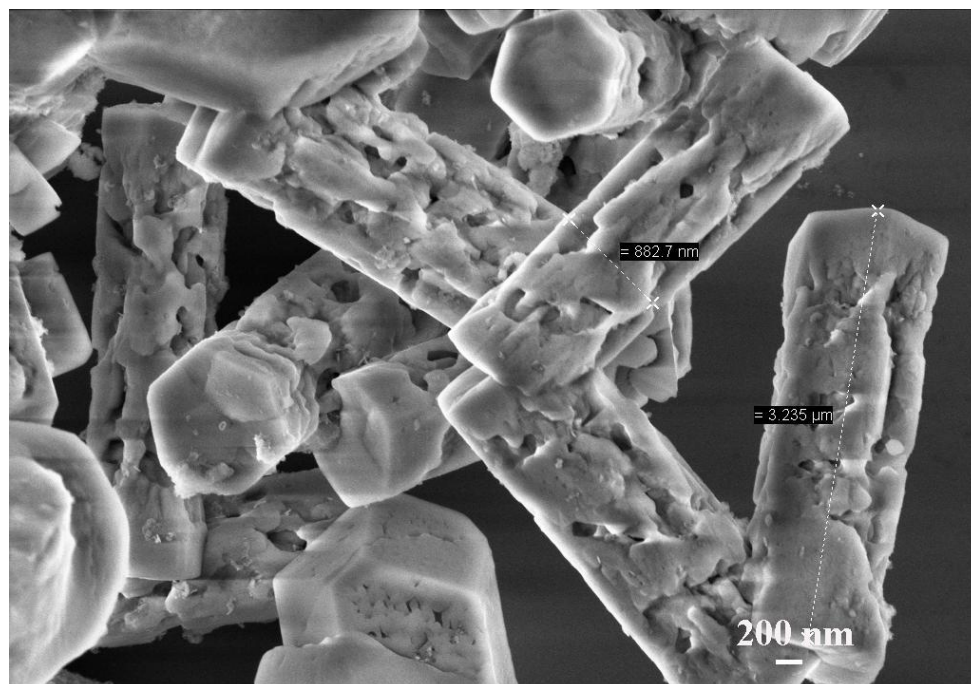

Figure S1 SEM image of synthesized NaYF<sub>4</sub>:Yb<sup>3+</sup>/Er<sup>3+</sup>

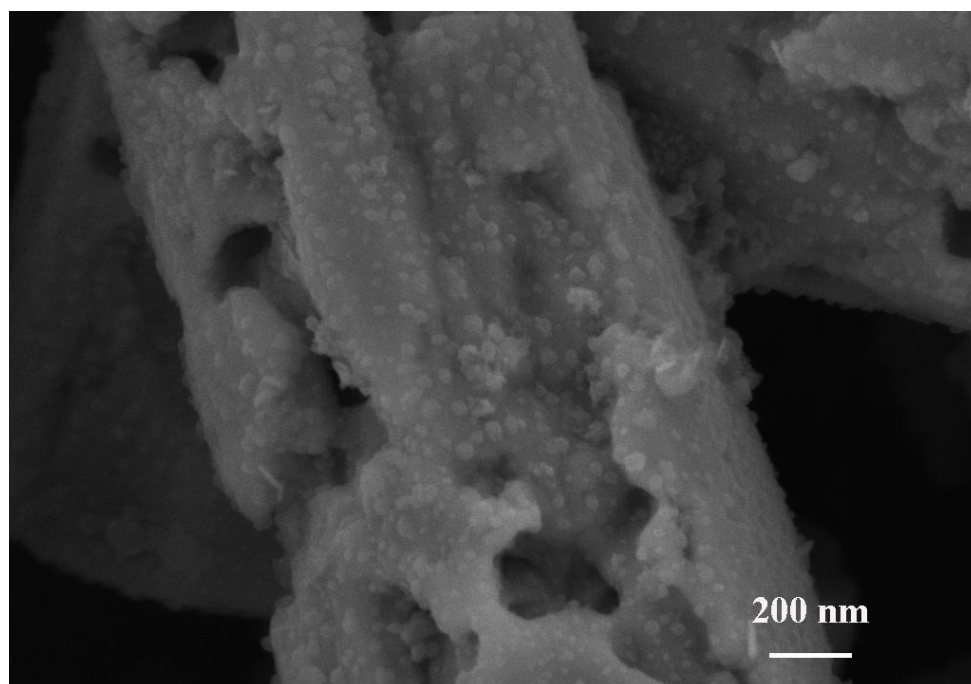

Figure S2 Higher SEM image of synthesized NaYF<sub>4</sub>:Yb<sup>3+</sup>/Er<sup>3+</sup>

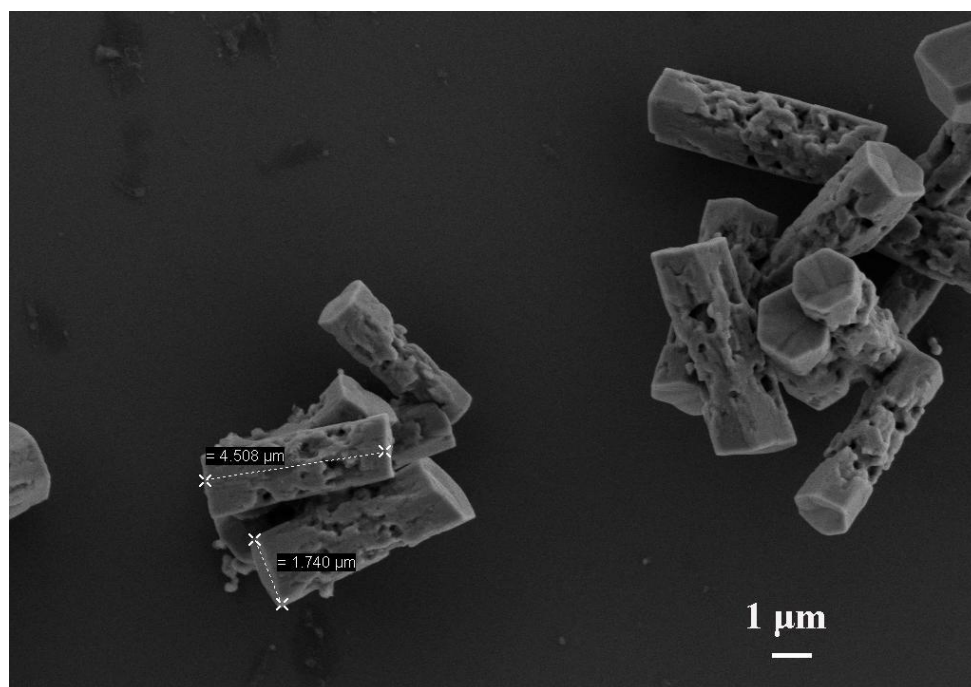

Figure S3 SEM image of synthesized NaYF<sub>4</sub>:Yb<sup>3+</sup>/Tm<sup>3+</sup>

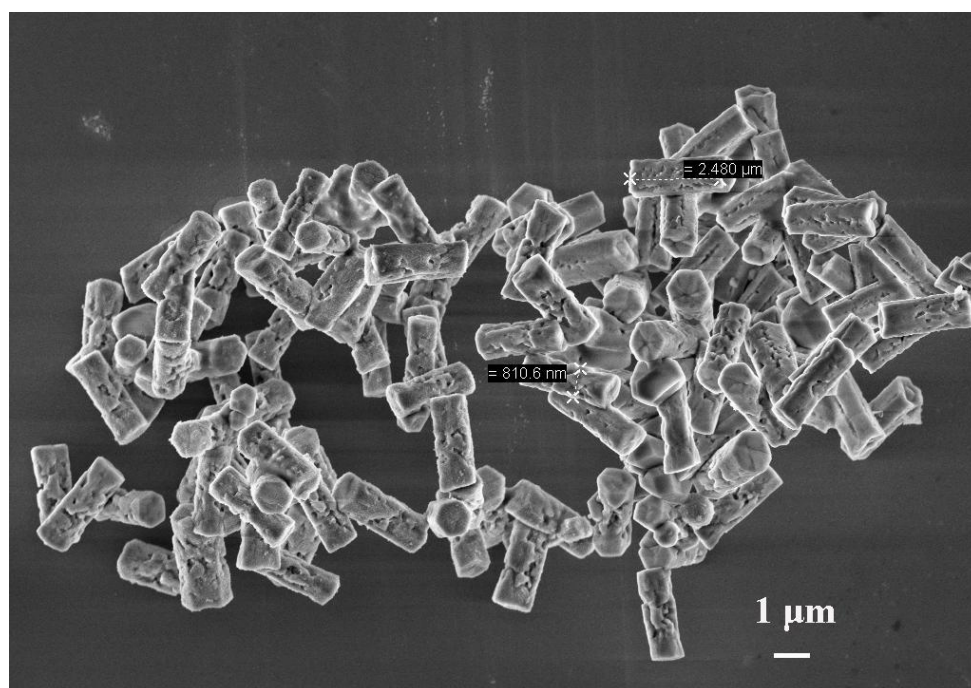

Figure S4 SEM image of synthesized NaYF<sub>4</sub>:Yb<sup>3+</sup>/Ho<sup>3+</sup>

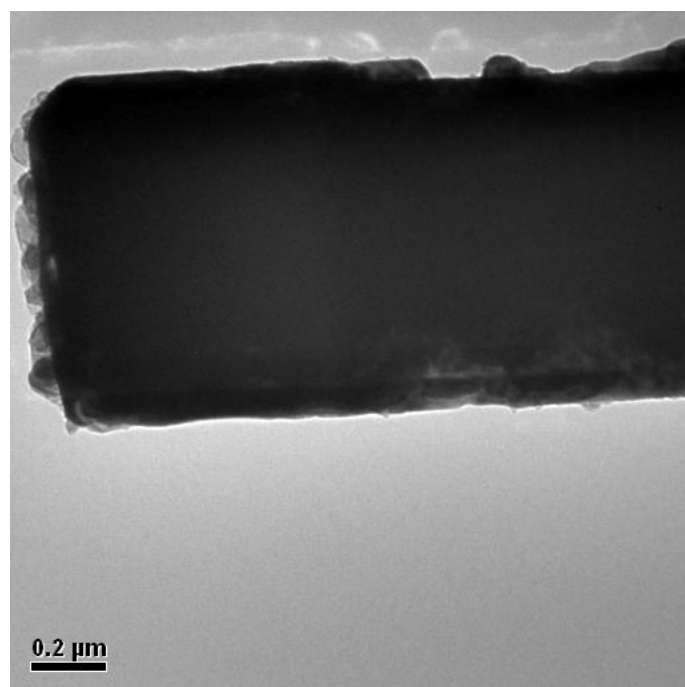

**Figure S5-1** TEM image of synthesized  $\text{NaYF}_4:\text{Yb}^{3+}/\text{Er}^{3+}$  nanocrystals: TEM image shows that the  $\text{NaYF}_4:\text{Yb}^{3+}/\text{Er}^{3+}$  microrods have a well-defined edge, and some small particles are aggregated on its surface

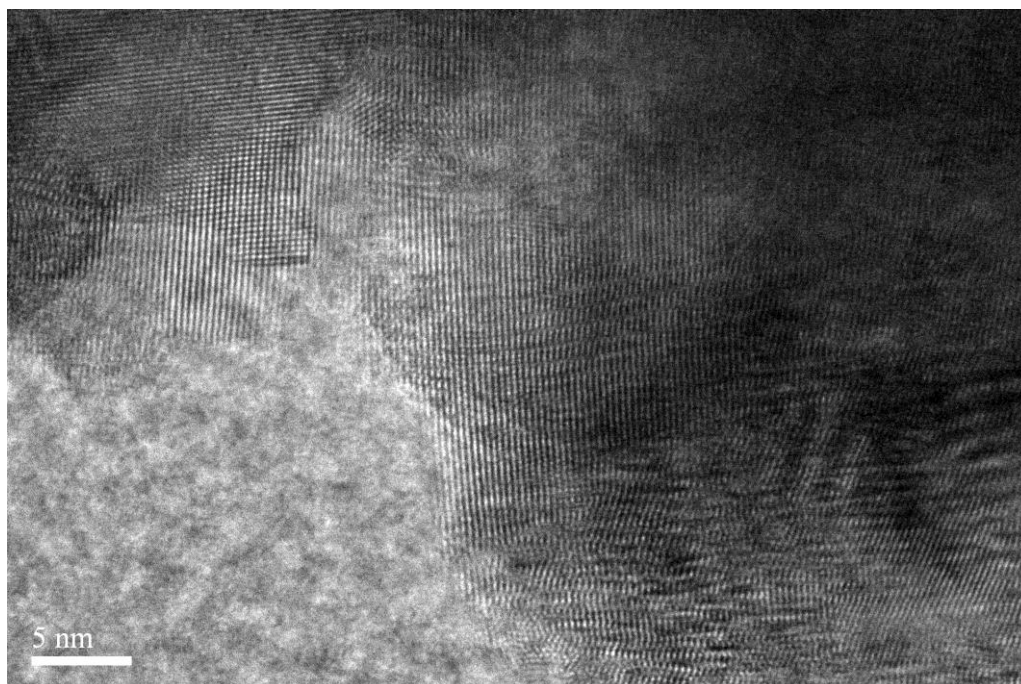

**Figure S5-2** HRTEM image of synthesized  $\text{NaYF}_4:\text{Yb}^{3+}/\text{Tm}^{3+}$  nanocrystals: HRTEM image shows the  $\text{NaYF}_4:\text{Yb}^{3+}/\text{Tm}^{3+}$  nanocrystals have a high crystallinity.

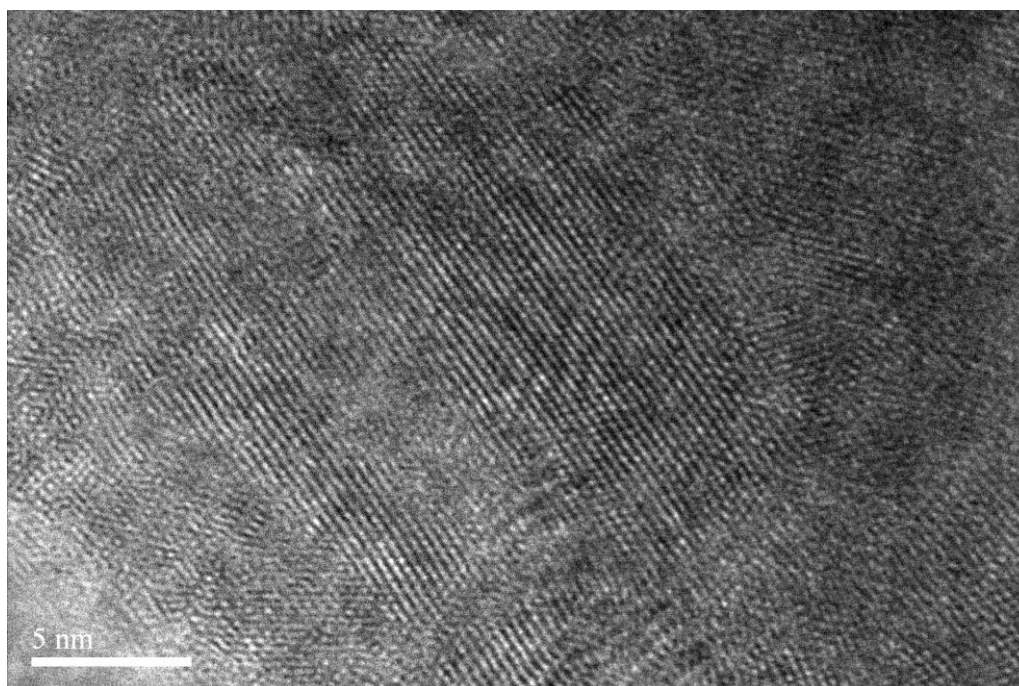

**Figure S5-3** HRTEM image of synthesized NaYF<sub>4</sub>:Yb<sup>3+</sup>/Ho<sup>3+</sup> nanocrystals: HRTEM image shows NaYF<sub>4</sub>:Yb<sup>3+</sup>/Ho<sup>3+</sup> nanocrystals have clear and continuous fringe lattice.

**Figure S5** TEM image of NaYF<sub>4</sub>:Yb<sup>3+</sup>/Er<sup>3+</sup> nanocrystals (**Figure S5-1**), HRTEM image of NaYF<sub>4</sub>:Yb<sup>3+</sup>/Tm<sup>3+</sup> nanocrystals (**Figure S5-2**) and HRTEM image of NaYF<sub>4</sub>:Yb<sup>3+</sup>/Ho<sup>3+</sup> nanocrystals (**Figure S5-3**)

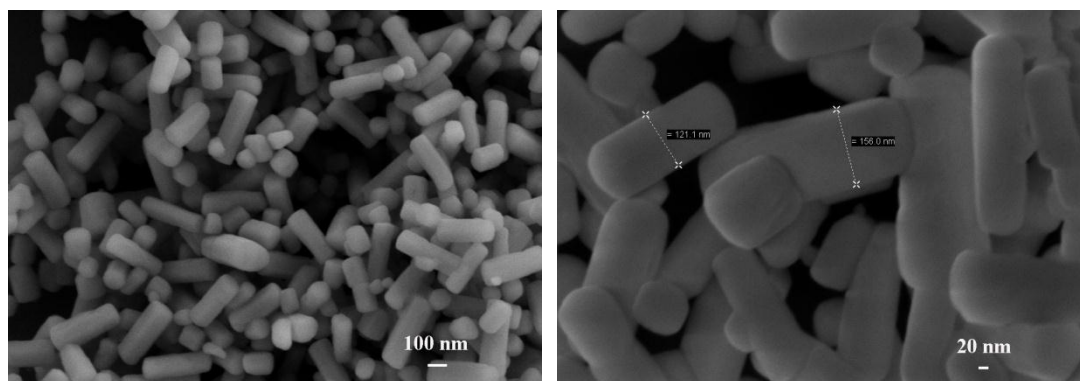

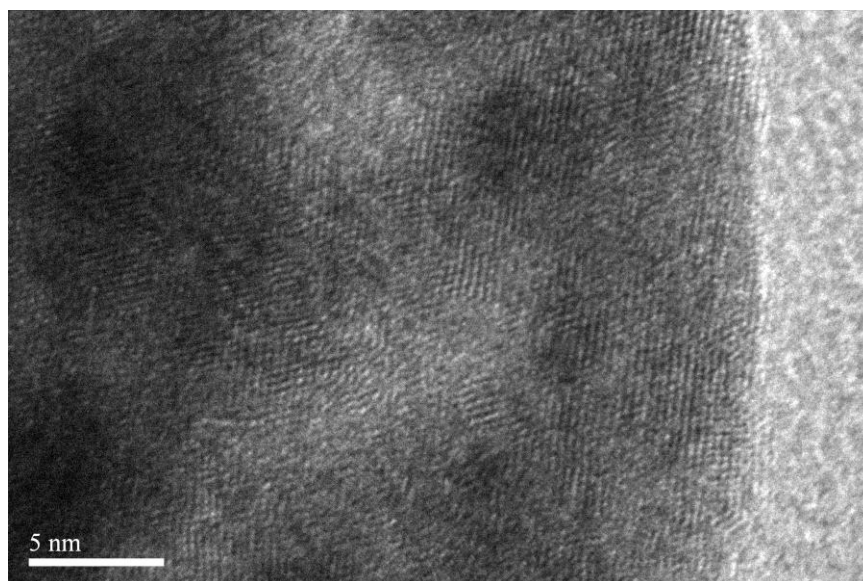

**Figure S6-1** SEM image (top-left), higher SEM image (top-right) and HRTEM image (down) of synthesized NaGdF<sub>4</sub>:Yb<sup>3+</sup>/Er<sup>3+</sup>

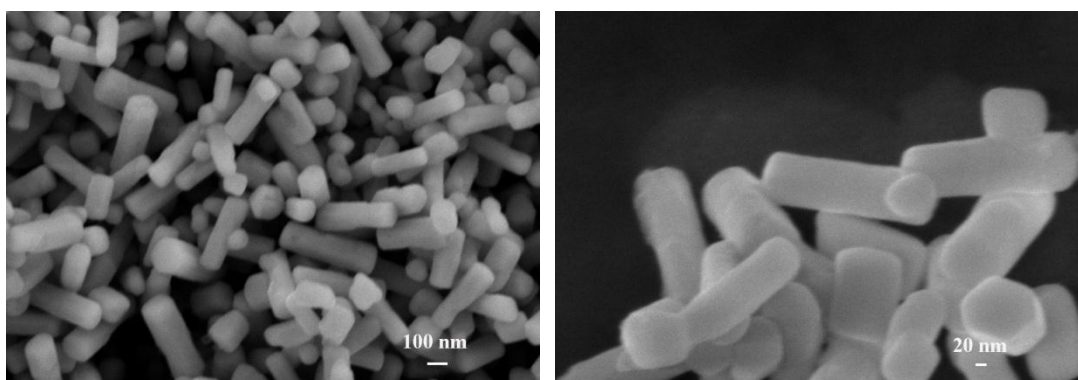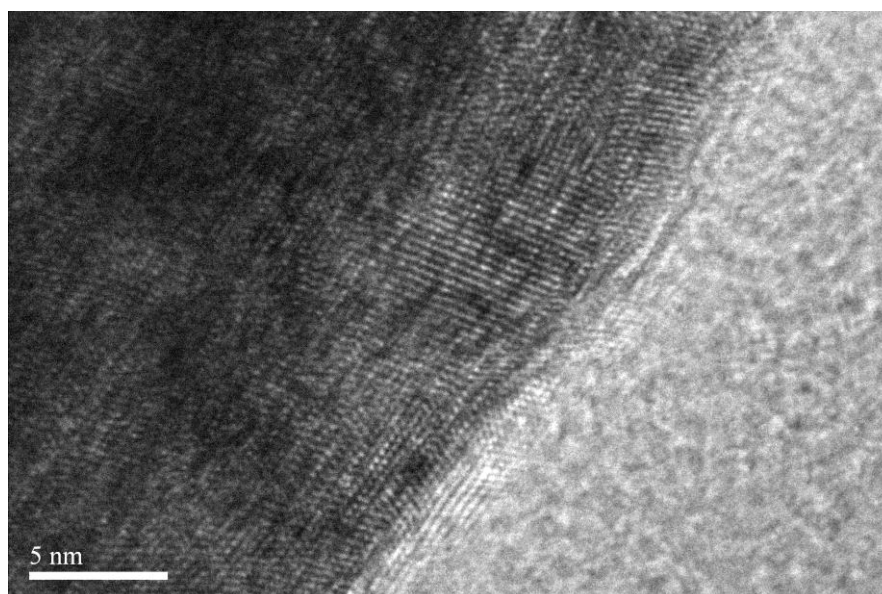

**Figure S6-2** SEM image (top-left), higher SEM image (top-right) and HRTEM image (down) of synthesized NaGdF<sub>4</sub>:Yb<sup>3+</sup>/Tm<sup>3+</sup>

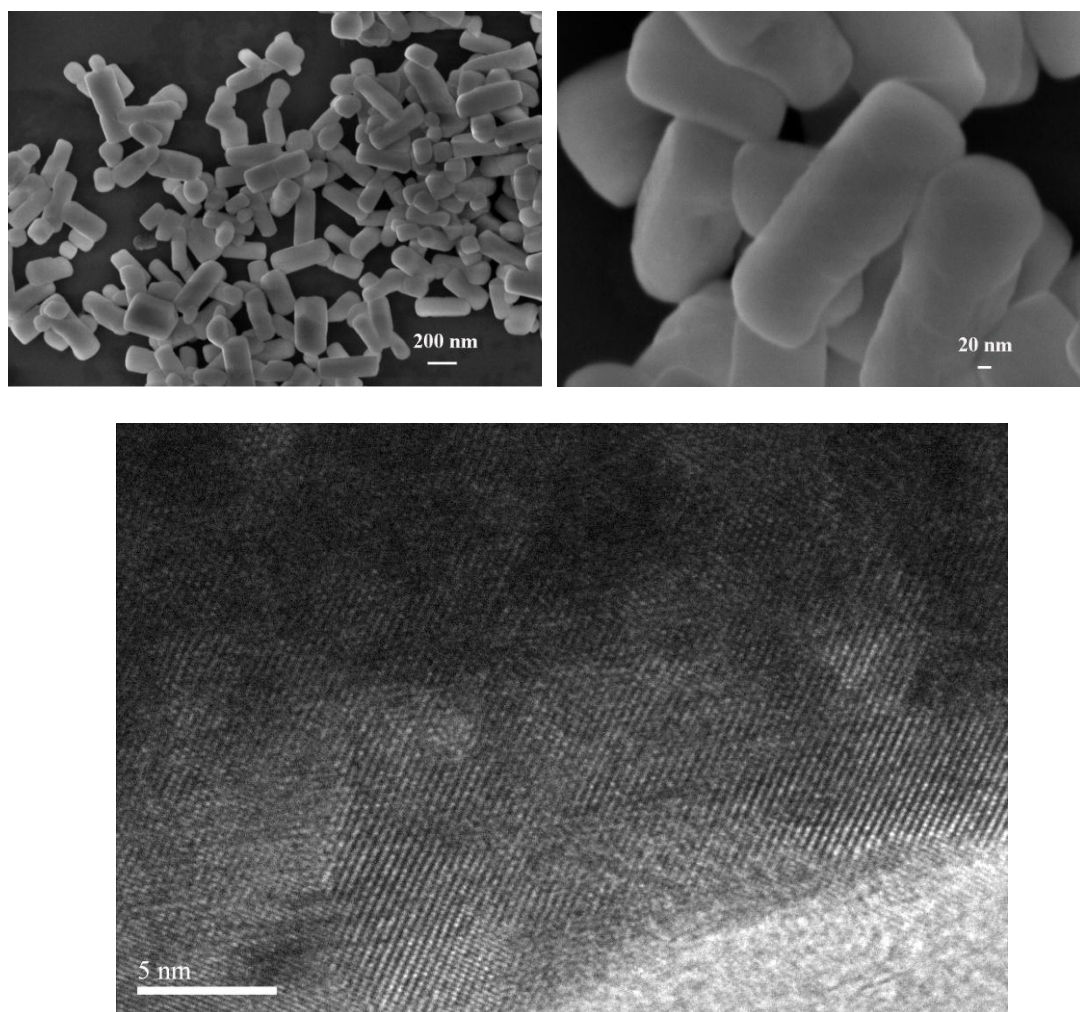

**Figure S6-3** SEM image (top-left), higher SEM image (top-right) and HRTEM image (down) of synthesized  $\text{NaGdF}_4:\text{Yb}^{3+}/\text{Ho}^{3+}$

**Figure S6** SEM and TEM images of the synthesized  $\text{NaGdF}_4:\text{Yb}^{3+}/\text{Er}^{3+}$  (**Figure S6-1**),  $\text{NaGdF}_4:\text{Yb}^{3+}/\text{Tm}^{3+}$  (**Figure S6-2**) and  $\text{NaGdF}_4:\text{Yb}^{3+}/\text{Ho}^{3+}$  (**Figure S6-3**)

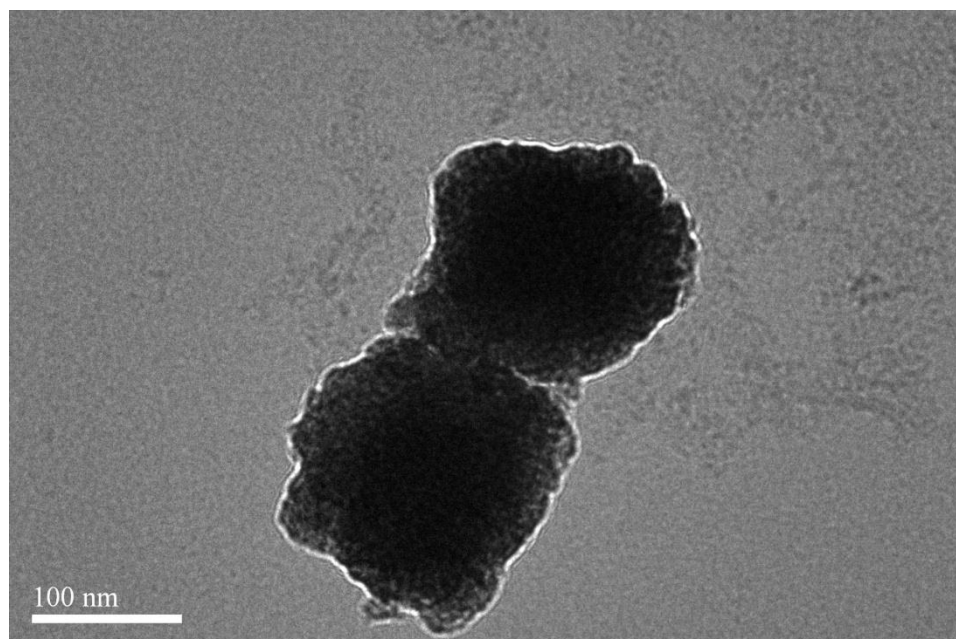

Figure S7 TEM image of the precursors formed at room temperature

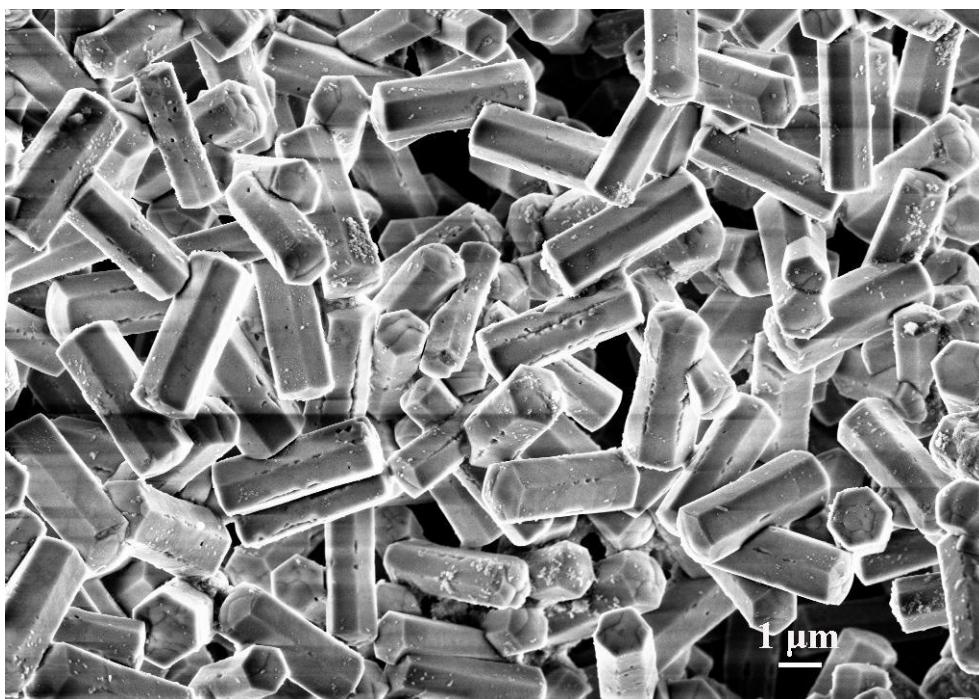

Figure S8 SEM image of the precursors formed at 200 °C

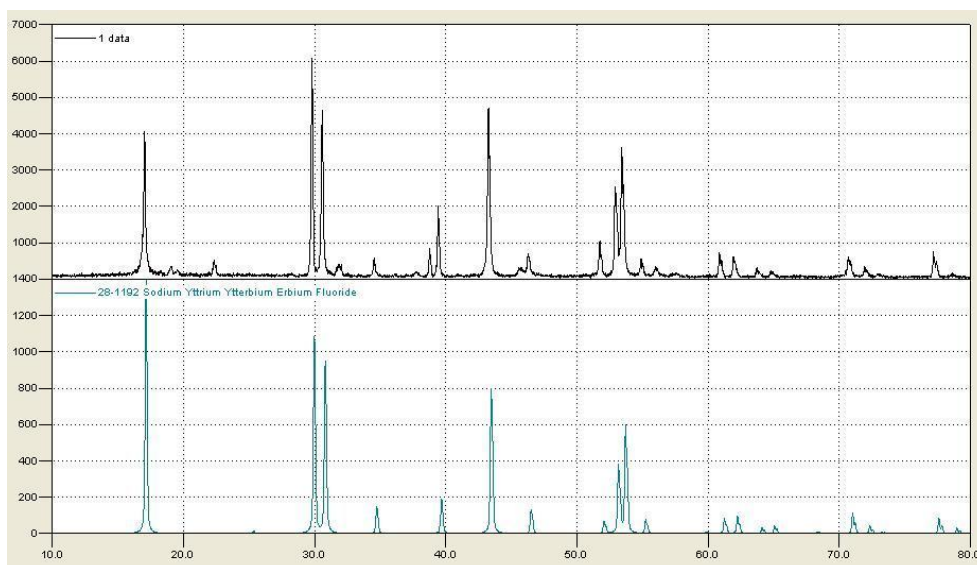

Figure S9 XRD pattern of the synthesized  $\text{NaYF}_4:\text{Yb}^{3+}/\text{Er}^{3+}$  nanocrystals

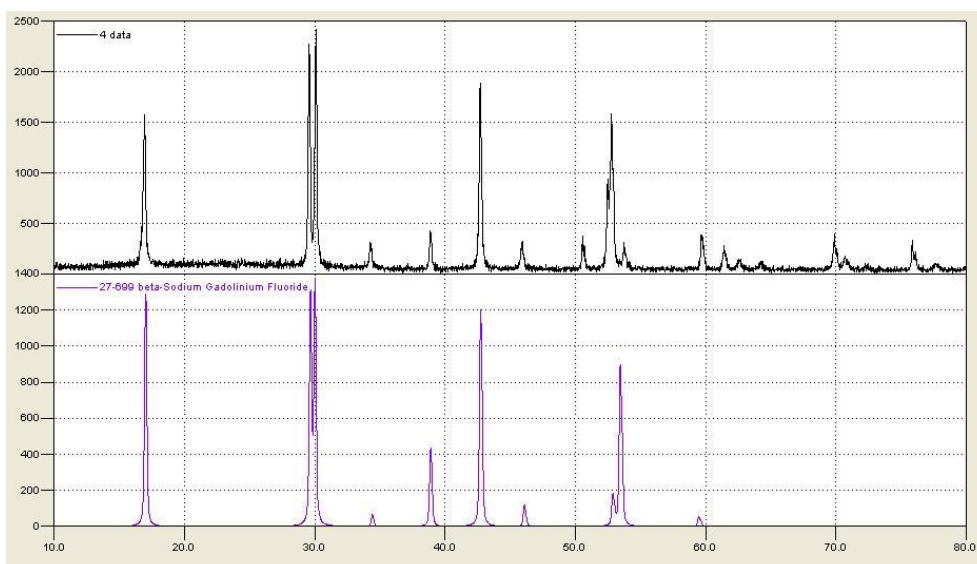

Figure S10 XRD pattern of the synthesized  $\text{NaGdF}_4:\text{Yb}^{3+}/\text{Er}^{3+}$  nanocrystals

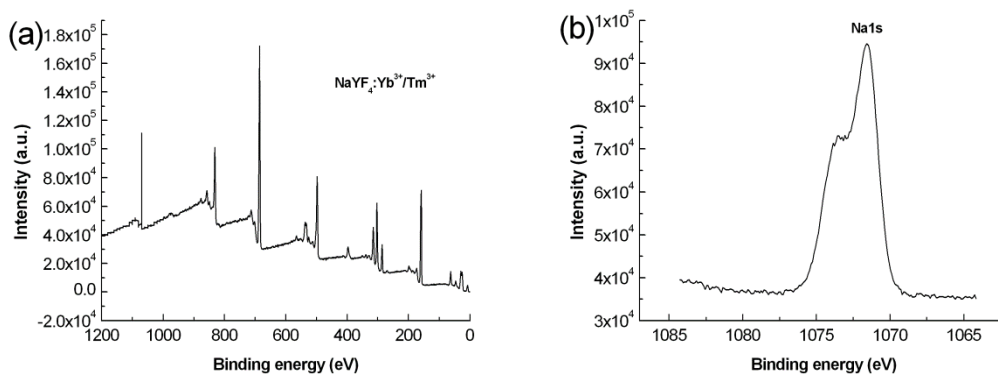

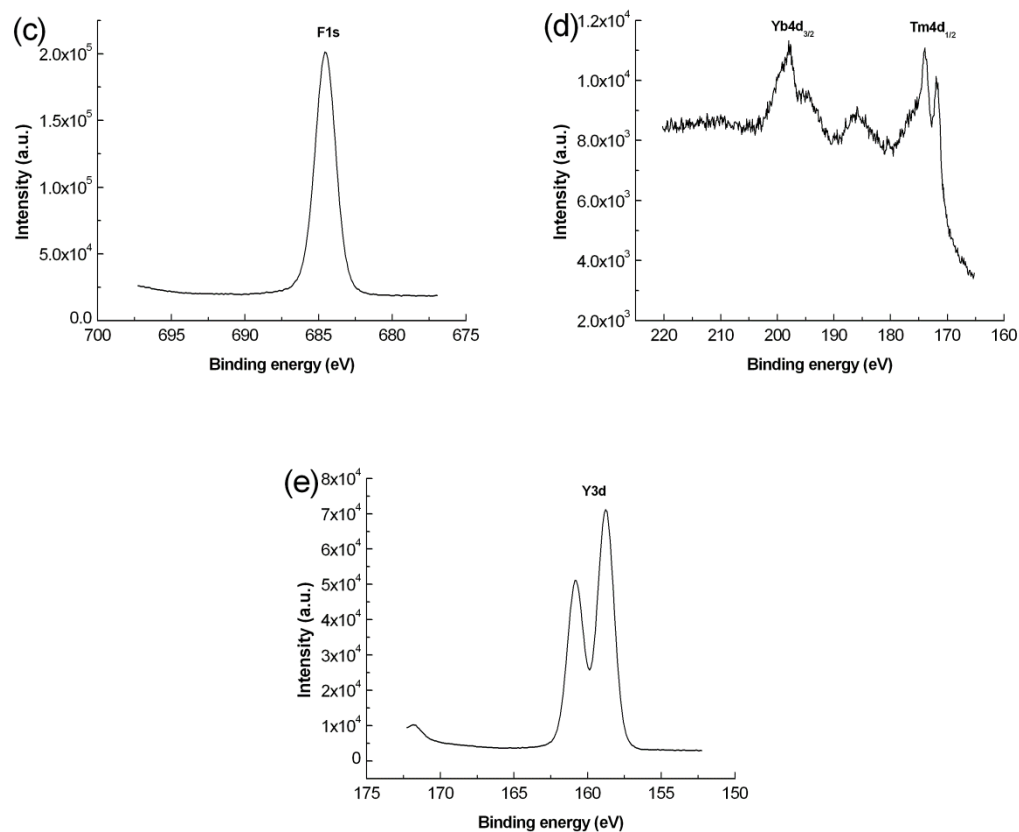

**Figure S11** XPS spectra of NaYF<sub>4</sub>:Yb<sup>3+</sup>/Tm<sup>3+</sup> nanorods, the survey spectrum (a), Na1s region (b), F1s region (c), Yb4d and Tm4d region (d), Y3d region (e).

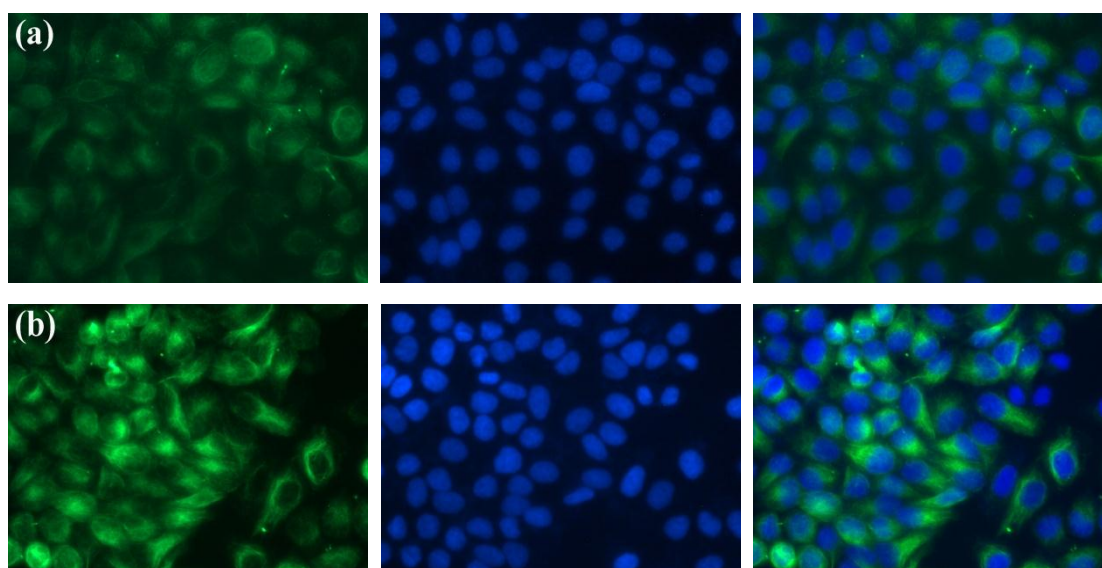

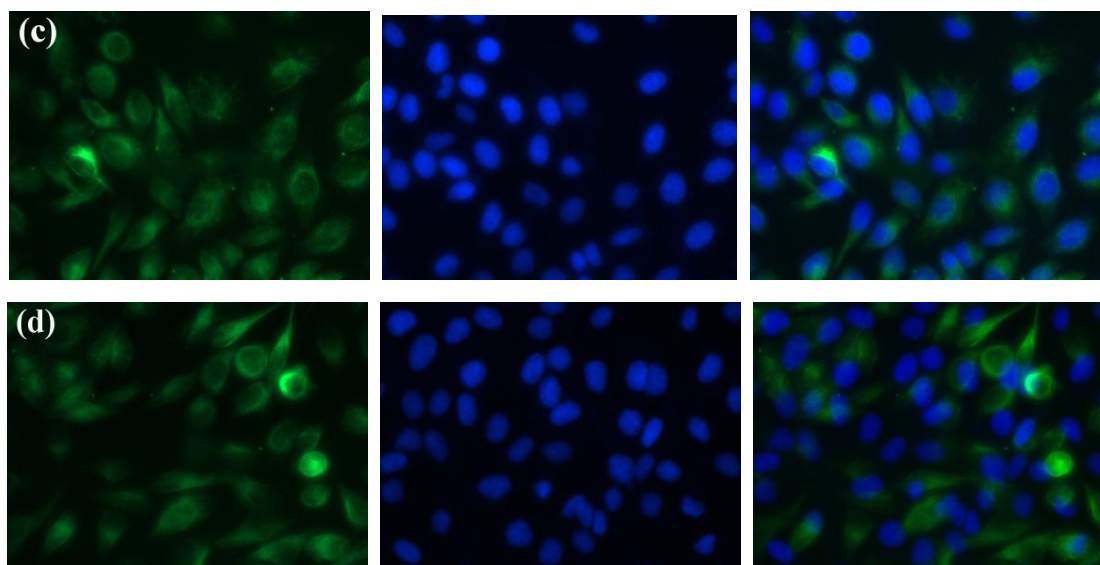

**Figure S12-1.** Fluorescence imaging of GES-1 cells before and after incubation with different concentration of NaGdF<sub>4</sub>:Yb<sup>3+</sup>/Er<sup>3+</sup> nanocrystals **after 1 day** by a fluorescence microscope (LEICA, DFC300 FX), control cells (a), with 20 µg/mL NaGdF<sub>4</sub>:Yb<sup>3+</sup>/Er<sup>3+</sup> nanocrystals (b), with 50 µg/mL NaGdF<sub>4</sub>:Yb<sup>3+</sup>/Er<sup>3+</sup> nanocrystals (c) and with 100 µg/mL NaGdF<sub>4</sub>:Yb<sup>3+</sup>/Er<sup>3+</sup> nanocrystals (d). Note that: Left column, fluorescent images of cell skeleton in green field; middle column, fluorescent images of cells nucleus in blue field; right column, overlay of left and middle columns.

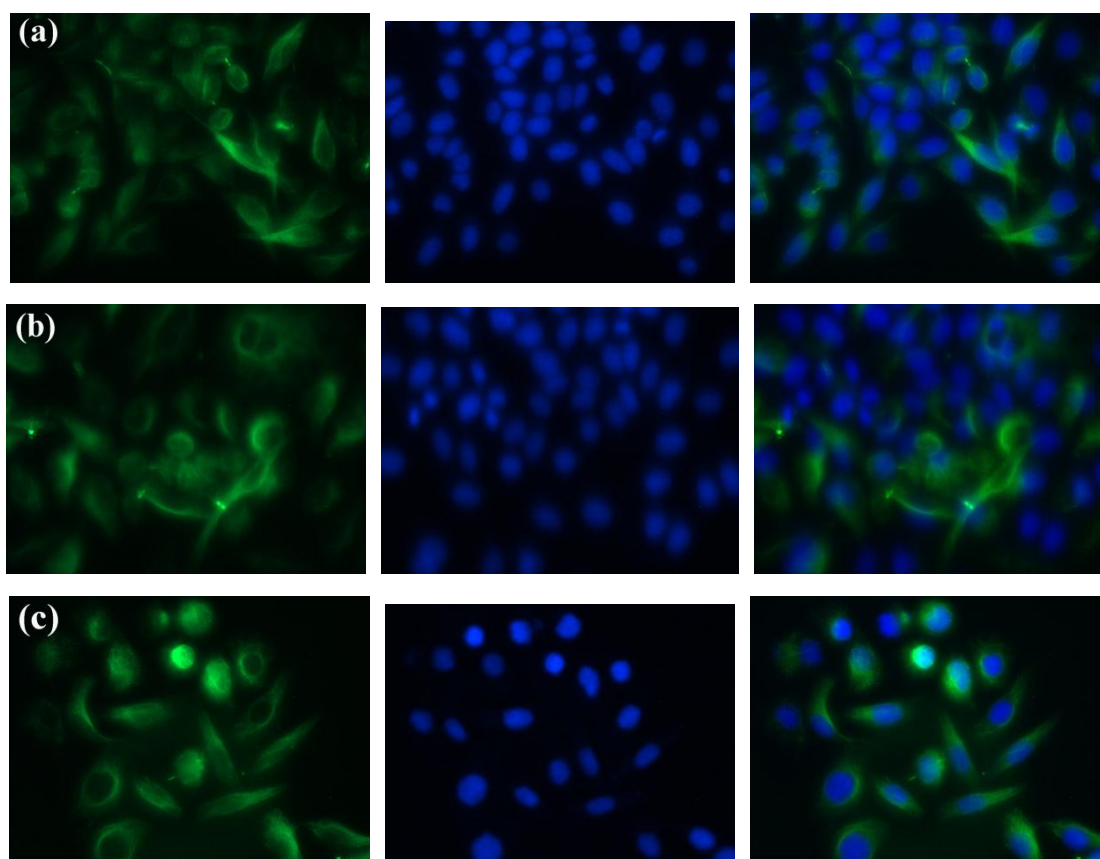

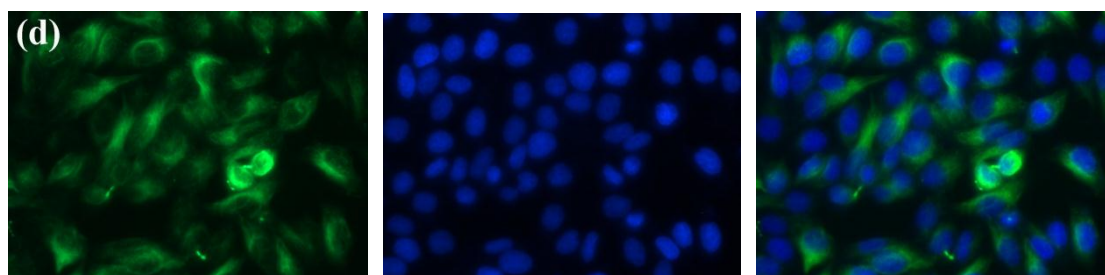

**Figure S12-2.** Fluorescence imaging of GES-1 cells before and after incubation with different concentration of  $\text{NaGdF}_4:\text{Yb}^{3+}/\text{Er}^{3+}$  nanocrystals **after 2 day** by a fluorescence microscope (LEICA, DFC300 FX), control cells (a), with  $20\ \mu\text{g/mL}$   $\text{NaGdF}_4:\text{Yb}^{3+}/\text{Er}^{3+}$  nanocrystals (b), with  $50\ \mu\text{g/mL}$   $\text{NaGdF}_4:\text{Yb}^{3+}/\text{Er}^{3+}$  nanocrystals (c) and with  $100\ \mu\text{g/mL}$   $\text{NaGdF}_4:\text{Yb}^{3+}/\text{Er}^{3+}$  nanocrystals (d). Note that: Left column, fluorescent images of cell skeleton in green field; middle column, fluorescent images of cells nucleus in blue field; right column, overlay of left and middle columns.

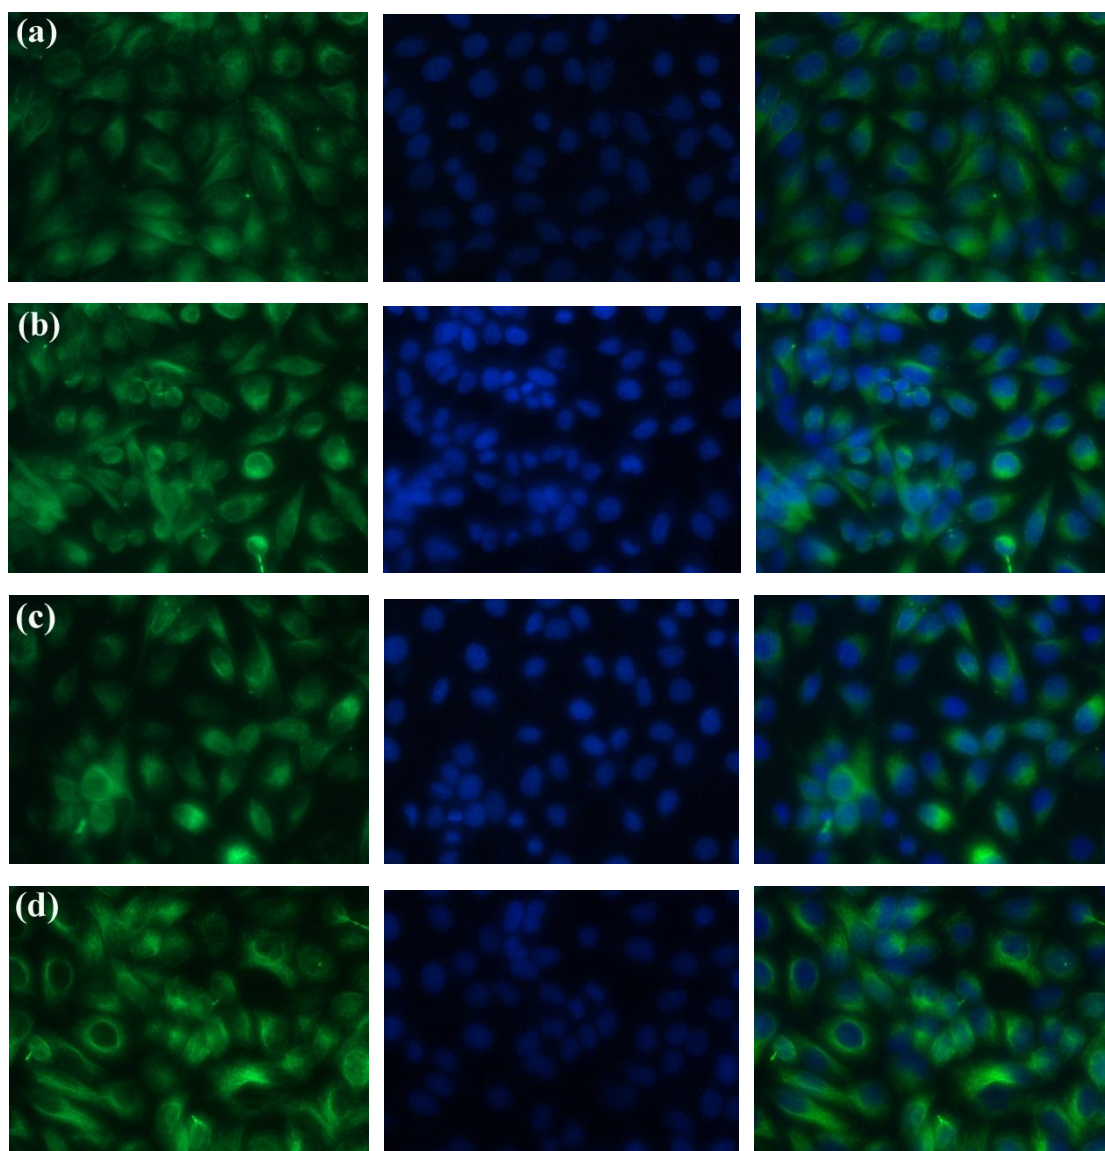

**Figure S12-3.** Fluorescence imaging of GES-1 cells before and after incubation with

different concentration of  $\text{NaGdF}_4:\text{Yb}^{3+}/\text{Er}^{3+}$  nanocrystals **after 3 day** by a fluorescence microscope (LEICA, DFC300 FX), control cells (a), with  $20\text{ }\mu\text{g/mL}$   $\text{NaGdF}_4:\text{Yb}^{3+}/\text{Er}^{3+}$  nanocrystals (b), with  $50\text{ }\mu\text{g/mL}$   $\text{NaGdF}_4:\text{Yb}^{3+}/\text{Er}^{3+}$  nanocrystals (c) and with  $100\text{ }\mu\text{g/mL}$   $\text{NaGdF}_4:\text{Yb}^{3+}/\text{Er}^{3+}$  nanocrystals (d). Note that: Left column, fluorescent images of cell skeleton in green field; middle column, fluorescent images of cells nucleus in blue field; right column, overlay of left and middle columns.

**Figure S12.** Fluorescence imaging of GES-1 cells before and after incubation  $\text{NaGdF}_4:\text{Yb}^{3+}/\text{Er}^{3+}$  nanocrystals at different days, after 1 day (**Figure S12-1**), after 2 day (**Figure S12-2**) and after 3 day (**Figure S12-3**).

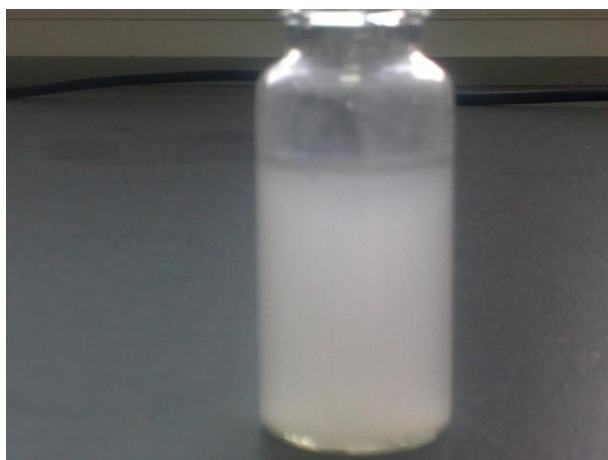

**Figure S13.** Photonic image of  $0.1\text{ g}$   $\text{NaGdF}_4:\text{Yb}^{3+}/\text{Er}^{3+}$  nanorods dispersed in  $10\text{ mL}$  deionized water.
